# Supplementary material for: A neutral state green polymer with a superior transmissive light blue oxidized state
Source: Royal Society of Chemistry journal article supplement (doi:10.1039/b704936f), 2007-01-01
Supplement: b704936f.pdf [file b704936f.pdf]

## Electronic Supplementary Information:

### A Neutral State Green Polymer with Superior Transmissive Light Blue Oxidized State

Asuman Durmus,<sup>a</sup> Gorkem E. Gunbas<sup>a</sup>, Pinar Camurlu<sup>b</sup> and Levent Toppare\*<sup>a</sup>

<sup>a</sup> Department of Chemistry Middle East Technical University, 06531 Ankara, Turkey. Fax: 90 312 210 32 00  
Tel: 90 312 210 32 21 Email: [toppare@metu.edu.tr](mailto:toppare@metu.edu.tr)

<sup>b</sup> Department of Civil Engineering, Akdeniz University, 07058 Antalya, Turkey. Fax: 90 242 310 63 03 Tel: 90 242 310 63 22

#### 1) FTIR

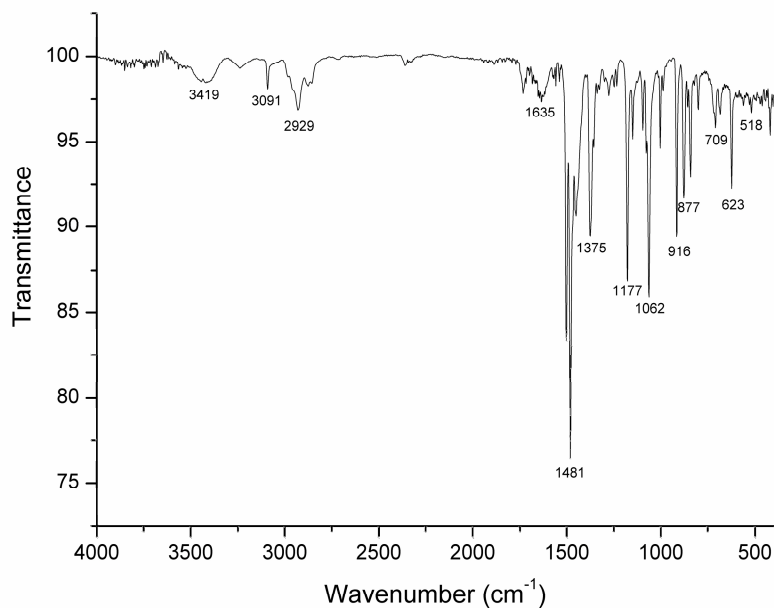

ESI-Fig 1. FT-IR spectrum of the monomer BDT.

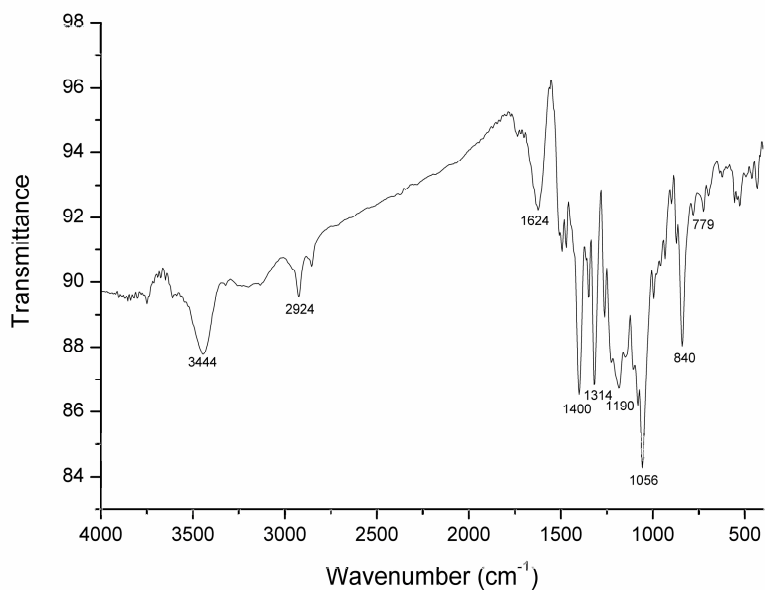

ESI-Fig 2. FT-IR spectrum of the polymer PBBD.

\*All the corresponding IR peaks related to the structures of the monomer and polymer were determined. Due to the polymerization the related C-H peaks of the EDOT moieties completely disappeared in the IR spectrum of the polymer. ( $3100, 877\text{ cm}^{-1}$ ).

## 2) SEM

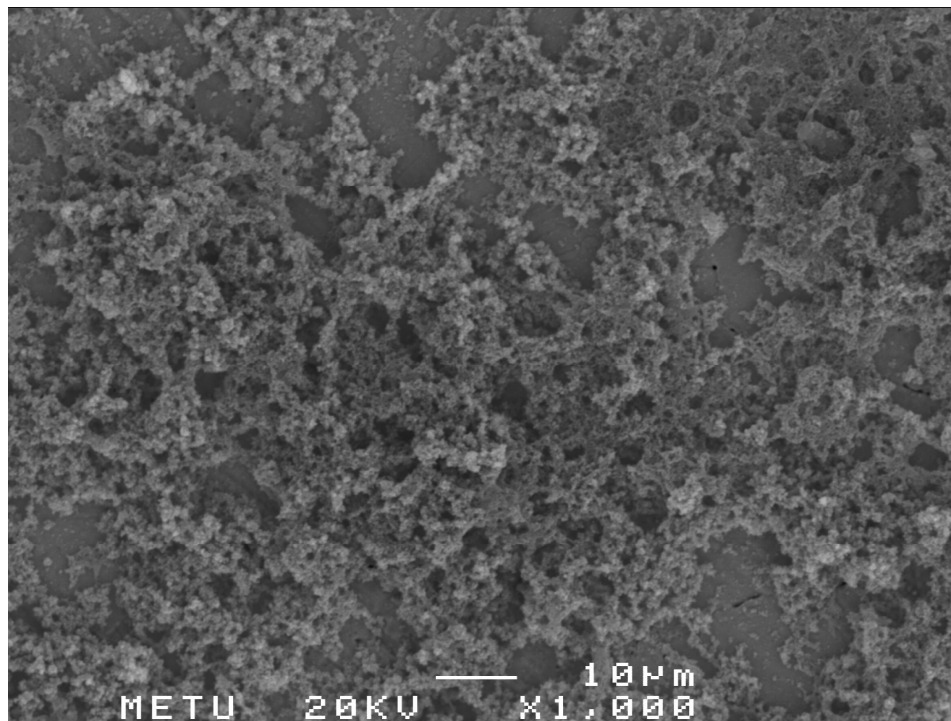

ESI-Fig 3. Scanning electron micrograph of the polymer coated at 75 mV/s in 0.1 M TBAPF<sub>6</sub>/DCM on Pt electrode.
